# Supplementary material
Source: Springer Nature journal article supplement (https://www.springermedizin.de/resource/supplementary/12947_2009_293_MOESM4_ESM.pdf/9556634)

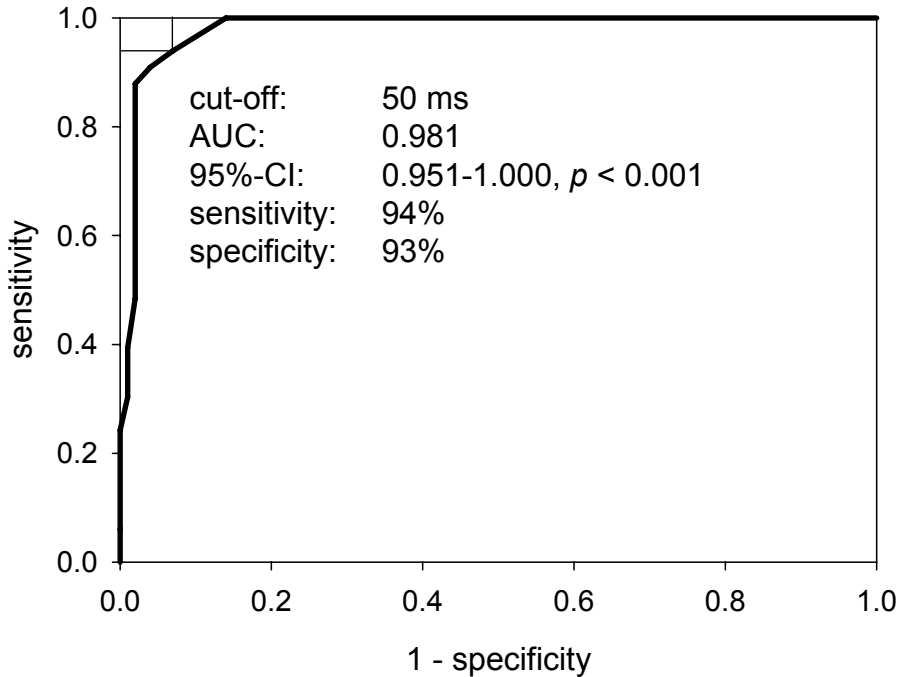

Supplement: MOESM4 [file 9556634]
